# Supplementary material for: Analyzing the atmospheric boundary layer using high-order moments obtained from multiwavelength lidar data: impact of wavelength choice
Source: Copernicus journal article supplement (doi:10.5194/amt-12-4261-2019), 2019-08-07
Supplement: Supplementary file 1 [file amt-12-4261-2019-supplement.pdf]

Supplement of Atmos. Meas. Tech., 12, 4261–4276, 2019  
<https://doi.org/10.5194/amt-12-4261-2019-supplement>  
© Author(s) 2019. This work is distributed under  
the Creative Commons Attribution 4.0 License.

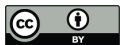

*Supplement of*

## **Analyzing the atmospheric boundary layer using high-order moments obtained from multiwavelength lidar data: impact of wavelength choice**

**Gregori de Arruda Moreira et al.**

*Correspondence to:* Gregori de Arruda Moreira ([gregori.moreira@usp.br](mailto:gregori.moreira@usp.br))

The copyright of individual parts of the supplement might differ from the CC BY 4.0 License.

The figures C1 and C2 represent the height plot of *RCS* to 355 nm and 1064 nm, respectively, obtained during the Case Study I.

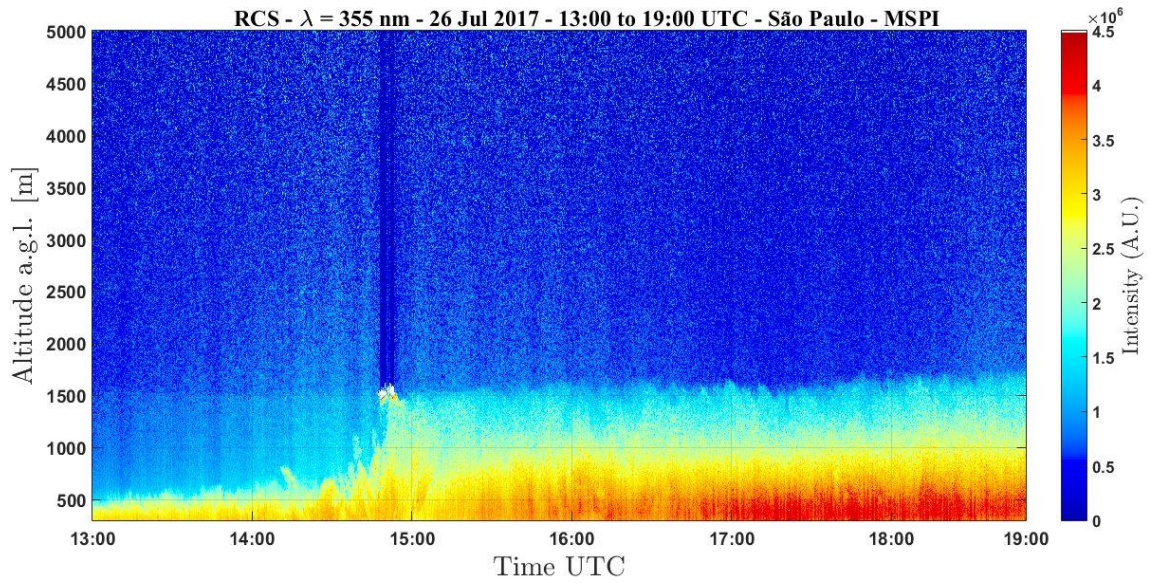

Figure C1. Time Height plot of  $RCS_{355}$

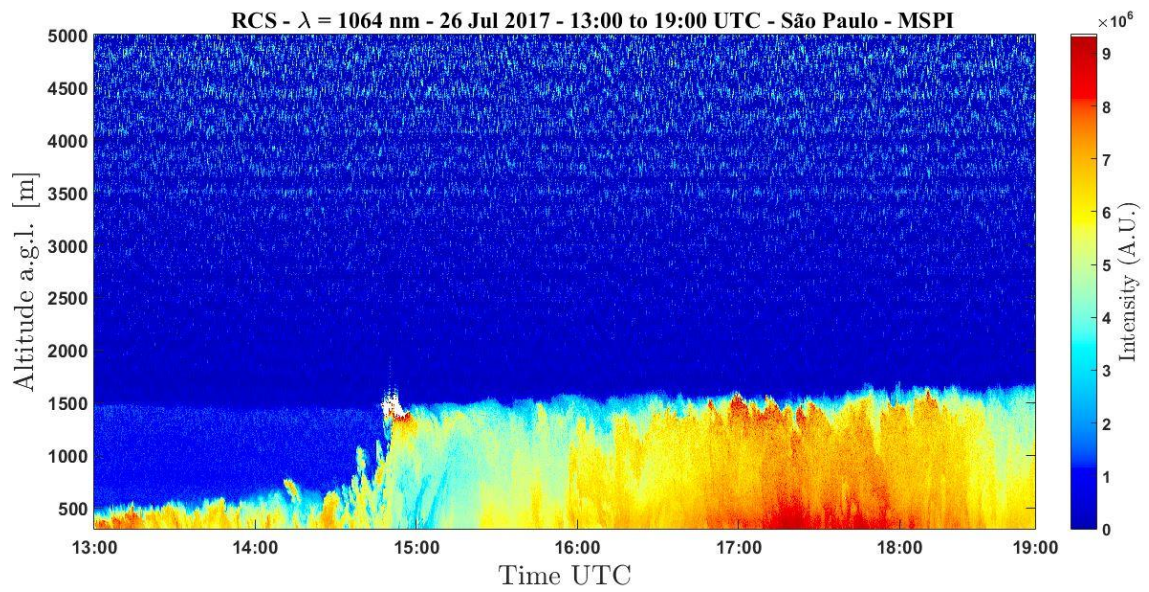

Figure C2. Time Height plot of  $RCS_{1064}$

In the figure C3 are presented the backscatter, extinction and Lidar Ratio (LR) profile for 19<sup>th</sup> July 2018. The LR oscillate around the mean lidar ratio of  $53 \pm 7$  sr, which is a strong indication that there is no changes in the aerosol optical properties during the turbulence analysis period. In agreement with the premises adopted to generate the equation 2.

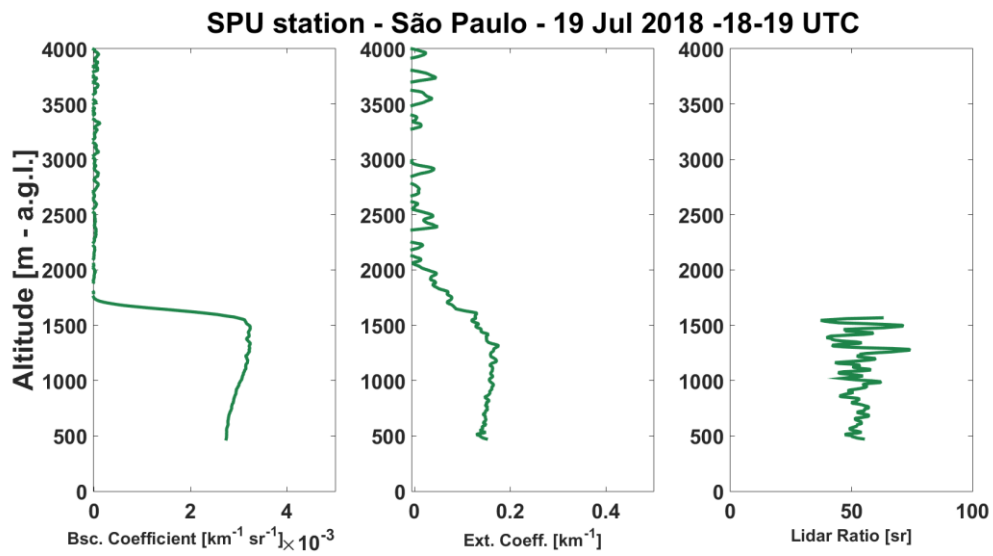

Figure C3. Bac3kscatter, extinction and Lidar ratio profile retrieved using Rotational Raman lidar analysis for 19 of July 2018.
